# Supplementary material
Source: PubMed Central journal article supplement (PMC3589527)
Supplement: NIHMS445613-supplement-Patient_characteristics.pdf [file NIHMS445613-supplement-Patient_characteristics.pdf]

|    |             |    |      |       |       |        |        |        |        |       |       |       |       |       |  |  |  |
|----|-------------|----|------|-------|-------|--------|--------|--------|--------|-------|-------|-------|-------|-------|--|--|--|
| 27 | Epilepsy    | 12 | 17   | 33    | 40    | 2 PP*  | 37 PP  |        |        |       |       |       |       |       |  |  |  |
| 28 | Epilepsy    | 30 | 36   | 40    | 2 PP* | 43 PP  |        |        |        |       |       |       |       |       |  |  |  |
| 29 | Epilepsy    | 6  | 20   | 25    | 30    | 35     | 3 PP*  | 17 PP  |        |       |       |       |       |       |  |  |  |
| 30 | Epilepsy    | 36 |      |       |       |        |        |        |        |       |       |       |       |       |  |  |  |
| 31 | Epilepsy    | 2  | 9    | 14    | 17    | 21     | 27     | 32     | 38     | 40    |       |       |       |       |  |  |  |
| 32 | Epilepsy    | 35 | 40   | 13 PP | 35 PP |        |        |        |        |       |       |       |       |       |  |  |  |
| 33 | Psychiatric | 25 | 7 PP | 10 PP | 11 PP | 15 PP  | 27 PP  | 31 PP  | 44 PP  |       |       |       |       |       |  |  |  |
| 34 | Epilepsy    | 9  | 13   | 18    | 24    | 29     | 36     | 40     | 4 PP*  |       |       |       |       |       |  |  |  |
| 35 | Epilepsy    | 12 | 17   | 21    | 33    | 41     | 4 PP*  |        |        |       |       |       |       |       |  |  |  |
| 36 | Epilepsy    | PC | 11   | 16    | 26    | 32     | 36     | 38     |        |       |       |       |       |       |  |  |  |
| 37 | Epilepsy    | 13 | 19   | 23    | 34    | 41     | 3 PP*  |        |        |       |       |       |       |       |  |  |  |
| 38 | Epilepsy    | 6  | 12   | 22    | 34    | 4 PP*  |        |        |        |       |       |       |       |       |  |  |  |
| 39 | Epilepsy    | 14 | 30   | 35    | 39    | 3 PP*  | 13 PP* |        |        |       |       |       |       |       |  |  |  |
| 40 | Epilepsy    | 7  | 11   | 15    | 30    | 36     | 3 PP*  | 10 PP* | 17 PP* |       |       |       |       |       |  |  |  |
| 41 | Psychiatric | 27 | 29   | 34    | 40    | 4 PP*  | 8 PP   | 14 PP  | 20 PP  | 24 PP | 28 PP | 34 PP | 40 PP | 46 PP |  |  |  |
| 42 | Epilepsy    | PC | 8    | 12    | 28    | 35     | 40     | 4 PP*  | 8 PP*  |       |       |       |       |       |  |  |  |
| 43 | Epilepsy    | 17 |      |       |       |        |        |        |        |       |       |       |       |       |  |  |  |
| 44 | Epilepsy    | 32 | 35   | 39    | 3 PP* | 29 PP  | 41 PP  |        |        |       |       |       |       |       |  |  |  |
| 45 | Psychiatric | 34 | 9 PP |       |       |        |        |        |        |       |       |       |       |       |  |  |  |
| 46 | Epilepsy    | 26 | 28   | 36    | 39    | 7 PP*  | 14 PP* | 18 PP* |        |       |       |       |       |       |  |  |  |
| 47 | Epilepsy    | 20 | 29   | 36    | 3 PP* | 26 PP* |        |        |        |       |       |       |       |       |  |  |  |
| 48 | Psychiatric | 37 |      |       |       |        |        |        |        |       |       |       |       |       |  |  |  |
| 49 | Epilepsy    | 31 | 36   | 38    | 3 PP* | 4 PP*  | 6 PP*  | 9 PP   | 15 PP  | 23 PP | 38 PP |       |       |       |  |  |  |
| 50 | Epilepsy    | 16 | 23   | 27    | 32    | 40     | 10 PP* |        |        |       |       |       |       |       |  |  |  |
| 51 | Psychiatric | 23 | 32   | 37    | 1 PP* | 2 PP*  | 6 PP*  | 8 PP   |        |       |       |       |       |       |  |  |  |
| 52 | Psychiatric | 18 | 35   | 41    | 5 PP* |        |        |        |        |       |       |       |       |       |  |  |  |
| 53 | Epilepsy    | 10 | 15   | 23    | 27    | 31     | 37     | 40     | 1 PP*  |       |       |       |       |       |  |  |  |

PC = preconception; PP = Postpartum.

\* = Patient visits that were not included in the LTG clearance data analysis due to preconception LTG clearance values in that patient, or the sample being obtained < 6 weeks postpartum or while the subject was lactating.
